# Supplementary material for: Geological screening of onshore saline aquifers for CO2 storage: Paraná and Espírito Santo basins, Brazil
Source: Copernicus journal article supplement (doi:10.5194/adgeo-65-19-2024), 2024-11-08
Supplement: Supplementary file 1 [file adgeo-65-19-2024-supplement.pdf]

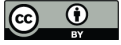

*Supplement of*

## **Geological screening of onshore saline aquifers for CO<sub>2</sub> storage: Paraná and Espírito Santo basins, Brazil**

**Francyne Bochi do Amarante et al.**

*Correspondence to:* Francyne Bochi do Amarante ([francyneb@gmail.com](mailto:francyneb@gmail.com))

The copyright of individual parts of the supplement might differ from the article licence.

**Table S1.** Formation testing and porosity data from well reports of Paraná Basin, including the page number where the information is found in the report and the type of porosity data (i.e. derived from petrophysical logs or core samples). The table also includes the top, base and thickness of the target unit - Rio Bonito Formation (RB Fm) - in each well. TDS stands for total dissolved solids, in ppm.

| Rio Bonito (RB) Fm - Paraná Basin |           |            |           | Formation Testing |       | Porosity  |                        |         |
|-----------------------------------|-----------|------------|-----------|-------------------|-------|-----------|------------------------|---------|
| Well identifier                   | Top RB Fm | Base RB Fm | Thickness | Page              | TDS   | Pages     | Type of data           | Average |
| 1CA 0001 PR                       | -987      | -1060      | 73        | no data           | x     | no data   | x                      | x       |
| 1CA 0002 PR                       | -1002     | -1093      | 91        | no data           | x     | 124       | core                   | 21.8%   |
| 1CA 0003 PR                       | -1102     | -1263      | 161       | 254               | 7095  | 362       | neutron log            | 18.5%   |
| 1CS 0002 PR                       | -2330     | -2600      | 270       | 715               | 10395 | 1065      | average, logs          | 19.5%   |
| 1ES 0001 RS                       | -2161     | -2324      | 163       | 92                | 39270 | no data   | x                      | x       |
| 1ES 0002 RS                       | -2133     | -2295      | 162       | 77                | 44550 | 113       | core                   | 16.2%   |
| 1GB 0001 PR                       | -2180     | -2454      | 274       | no data           | x     | no data   | x                      | x       |
| 1GP 0001 PR                       | -2032     | -2237      | 205       | no data           | x     | 141 - 143 | average, logs          | 12.5%   |
| 1MA 0001 SP                       | -1029     | -1115      | 86        | no data           | x     | 233-235   | neutron log            | 23.5%   |
| 1MB 0001 SC                       | -1425     | -1593      | 168       | 109               | 36300 | 184       | core                   | 11.5%   |
| 1MC 0001 RS                       | -2120     | -2263      | 143       | 81                | 17500 | 183       | core                   | 13.0%   |
| 1MC 0002 SC                       | -1623     | -1781      | 158       | 115               | 53000 | 197       | core                   | 13.8%   |
| 1PH 0001 PR                       | -1978     | -2327      | 349       | no data           | x     | 154       | effective porosity log | 12.0%   |
| 1PT 0001 PR                       | -2285     | -2443      | 158       | no data           | x     | 367-368   | core                   | 8.0%    |
| 1RCH 0001 SC                      | -2353     | -2421      | 68        | 102               | 49500 | 168       | average, logs          | 10.0%   |
| 1RS 0001 PR                       | -2351     | -2537      | 186       | 182               | 21450 | 199       | neutron log            | 12.7%   |
| 1SJQ 0001 SC                      | -1596     | -1768      | 172       | no data           | x     | 124       | sonic log              | 13.5%   |
| 1TP 0001 SC                       | -2171     | -2308      | 137       | no data           | x     | 408       | core                   | 15.3%   |
| 1TP 0003 SC                       | -2223     | -2356      | 133       | no data           | x     | no data   | x                      | x       |
| 1TV 0002 SC                       | -1955     | -2094      | 139       | 203               | 25000 | 290-311   | core                   | 15.7%   |
| 1TV 0003 SC                       | -1942     | -2080      | 138       | 165               | 39000 | 185-198   | core                   | 13.3%   |
| 1TV 0004 SC                       | -1919     | -2060      | 141       | 176               | 54500 | 248-257   | core                   | 14.5%   |
| 2AA 0001 SP                       | -1858     | -1934      | 76        | no data           | x     | 275       | neutron log            | 18.5%   |
| 2AO 0001 RS                       | -2093     | -2221      | 128       | 105               | 29370 | 246-252   | core                   | 16.0%   |
| 2AR 0001 SP                       | -1907     | -1951      | 44        | no data           | x     | 187       | effective porosity log | 11.7%   |
| 2CA 0001 SC                       | -1625     | -1794      | 169       | no data           | x     | 222-223   | core                   | 11.1%   |
| 2LV 0001 RS                       | -2138     | -2283      | 145       | 155               | 36000 | 267       | average, logs          | 16.0%   |
| 2MC 0001 SC                       | -1742     | -1900      | 158       | 53                | 38000 | no data   | x                      | x       |
| 2MR 0001 RS                       | -2035     | -2137      | 102       | no data           | x     | no data   | x                      | x       |
| 2PI 0001 SC                       | -2014     | -2138      | 124       | 213               | 61000 | 250-256   | core                   | 15.0%   |
| 2PP 0001 SP                       | -2107     | -2156      | 49        | no data           | x     | no data   | x                      | x       |
| 2PU 0001 SC                       | -1040     | -1237      | 197       | 61                | 12000 | 70        | average, logs          | 23.1%   |
| 2RI 0001 RS                       | -1968     | -2147      | 179       | no data           | x     | no data   | x                      | x       |
| 2UV 0001 PR                       | -884      | -1091      | 207       | 205               | 16000 | 278-309   | core                   | 17.0%   |
| 3MC 0003 SC                       | -1623     | -1788      | 165       | 95                | 3000  | no data   | x                      | x       |
|                                   |           |            |           | median            | 36000 |           | median                 | 14.8%   |

**Table S2.** Formation testing and porosity data from well reports of Espírito Santo Basin, including the page number where the information is found in the report and the type of porosity data (i.e. derived from petrophysical logs or core samples). The table also includes the top, base and thickness of the target unit - Mucuri Member (M Mb) - in each well. TDS stands for total dissolved solids, in ppm.

| Mucuri (M) Member - Espírito Santo Basin |          |           |           | Formation Testing |        | Porosity |               |             |
|------------------------------------------|----------|-----------|-----------|-------------------|--------|----------|---------------|-------------|
| Well identifier                          | Top M Mb | Base M Mb | Thickness | Page              | TDS    | Page     | Type of data  | Average (%) |
| 1BN-0003-ES                              | -1404    | -1506     | 102       | 26                | 49000  | no data  | x             | x           |
| 1CCN-0001-ES                             | -962.92  | -1229     | 266.08    | 30                | 39600  | 63       | density log   | 22          |
| 1CMO-0001-ES                             | -1440    | -1476     | 36        | no data           | x      | no data  | x             | x           |
| 1FC-0001-ES                              | -1625.94 | -1824.15  | 198.21    | 94                | 80517  | no data  |               | x           |
| 1FRG-0001-ES                             | -1697    | -1859     | 162       | no data           | x      | no data  | x             | x           |
| 1IT-0002-ES                              | -1139    | -1211     | 72        | 24                | 57000  | 54       | average, logs | 18.5        |
| 1MAN-0001-ES                             | -1496.95 | -1632.53  | 135.58    | 41                | 2500   | 68       | average, logs | 13.6        |
| 1MAS-0001-ES                             | -1545    | -1690     | 145       | 17                | 76725  | 60       | average, logs | 12          |
| 1N-0002-ES                               | -1668.49 | -1998.92  | 330.43    | 126               | 55000  | 132      | core          | 18.3        |
| 1NO-0002-ES                              | -820     | -1092     | 272       | 25                | 26000  | 31       | average, logs | 19.5        |
| 1PRG-0001-ES                             | -1446.98 | -1599.88  | 152.9     | 36                | 91000  | no data  | x             | x           |
| 1RM-0001-ES                              | -1716    | -1830     | 114       | 83                | 1155   | 118      | density log   | 17.3        |
| 1RP-0001-ES                              | -1276    | -1485     | 209       | 41                | 63900  | no data  | x             | x           |
| 1RPO-0001-ES                             | -990.18  | -1249     | 258.82    | 53, 62            | 4120   | 85       | average, logs | 20          |
| 1RPS-0001-ES                             | -898.42  | -1128.83  | 230.41    | 45                | 990    | 89       | average, logs | 20.7        |
| 1RSM-0002-ES                             | -1014    | -1092     | 78        | no data           | x      | 54       | density log   | 5.5         |
| 1RSM-0008-ES                             | -926.72  | -1052.31  | 125.59    | 25, 37            | 31350  | 82       | average, logs | 20.0        |
| 1SJ-0001-ES                              | -1847.27 | -2134.21  | 286.94    | 27                | 124480 | no data  | x             | x           |
| 1SM-0001-ES                              | -1398.42 | -1505.02  | 106.6     | 93                | 1650   | 84       | sonic log     | 20.2        |
| 1SMO-0002-ES                             | -1191    | -1336     | 145       | 35                | 51150  | 50       | average, logs | 20          |
| 1SMO-0003-ES                             | -1061.93 | -1194.04  | 132.11    | 27                | 1650   | 37       | average, logs | 19.7        |
| 1SP-0001-ES                              | -1160.87 | -1571.43  | 410.56    | 40                | 87750  | 61       | average, logs | 19.0        |
| 2CBST0002-ES                             | -1186    | -1296     | 110       | no data           | x      | no data  | x             | x           |
| 2NST-0001-ES                             | -2020.09 | -2271.15  | 251.06    | no data           | x      | 154      | average, logs | 16          |
| 3CB-0004-ES                              | -1476    | -1516     | 40        | 24, 29            | 63650  | no data  | x             | x           |
| 3GU-0002-ES                              | -1696    | -1753     | 57        | 31, 42            | 96500  | 57       | average, logs | 27          |
| 3MA-0002-ES                              | -1414.95 | -1482.87  | 67.92     | no data           | x      | 42       | average, logs | 21.0        |
| 3RI-0003-ES                              | -1249.64 | -1322.14  | 72.5      | 35                | 13870  | 56       | average, logs | 24.5        |
| 3RIB-0002-ES                             | -927     | -973      | 46        | no data           | x      | no data  | x             | x           |
| 3RM-0002-ES                              | -1744    | -1885     | 141       | 29, 31            | 4100   | 50       | average, logs | 12.5        |
| 3RPS-0002-ES                             | -906.58  | -1191     | 284.42    | 42                | 495    | 144      | average, logs | 25          |
| 3RSM-0007-ES                             | -959.94  | -1141.85  | 181.91    | 44, 52            | 1037   | 90       | average, logs | 17.0        |
| 3RSM-0040-ES                             | -1063.78 | -1215.19  | 151.41    | no data           | x      | no data  | x             | x           |
| 3SM-0002-ES                              | -1438    | -1556     | 118       | 71, 74            | 73000  | no data  | x             | x           |
| 3SM-0003-ES                              | -1443.81 | -1668.08  | 224.27    | 80                | 80000  | 83       | average, logs | 17.2        |
| 4RM-0009-ES                              | -1564.36 | -1655.92  | 91.56     | no data           | x      | no data  | x             | x           |
| 4SM-0008-ES                              | -1410.79 | -1553.04  | 142.25    | no data           | x      | 96       | average, logs | 17.6        |
| 7RI-0026-ES                              | -1228    | -1363.4   | 135.4     | no data           | x      | 61       | density log   | 17.4        |
| 7RPO-0008-ES                             | -975.37  | -1232.5   | 257.13    | no data           | x      | 40       | average, logs | 19.9        |
| 7RSM-0035-ES                             | -966.98  | -1120.47  | 153.49    | 23                | 42900  | 53       | density log   | 16.3        |
| 7RSM-0046-ES                             | -989.29  | -1114.7   | 125.41    | no data           | x      | 35       | average, logs | 16.8        |
|                                          |          |           |           | Median            | 43610  |          | Median =      | 18.4        |
